# Supplementary material
Source: PubMed Central journal article supplement (PMC7331230)
Supplement: NIHMS1603221-supplement-supporting_information.pdf [file NIHMS1603221-supplement-supporting_information.pdf]

# Supporting Information for Ultrabright NIR fluorescent mesoporous silica nanoparticles

*Shajesh Palantavida<sup>1</sup>, Rui Tang<sup>3</sup>, Gail P. Sudlow<sup>3</sup>, Walter J. Akers<sup>3</sup>, Samuel Achilefu<sup>3,4</sup>, \* and Igor Sokolov<sup>1, 2\*</sup>*

Departments of <sup>1</sup>Mechanical Engineering and <sup>2</sup>Biomedical Engineering,  
Tufts University, Medford, MA 02155, USA

Departments of <sup>3</sup>Radiology and <sup>4</sup>Biomedical Engineering,  
Washington University, St. Louis, MO 63110

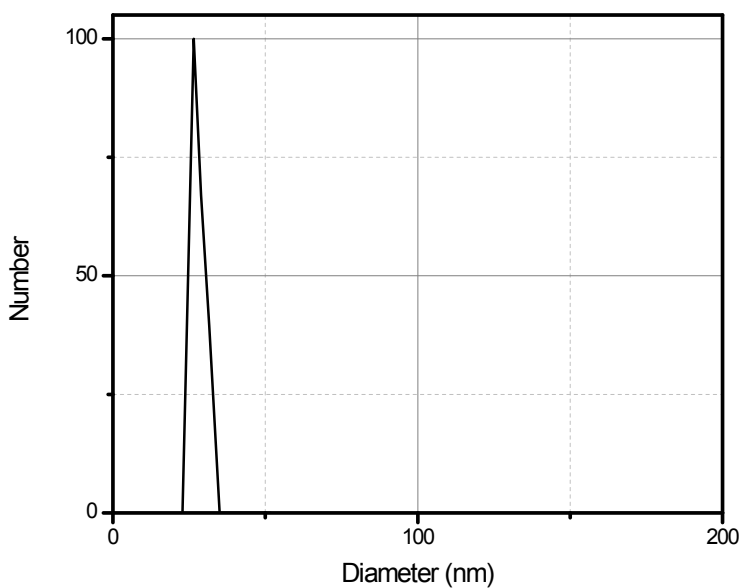

**Figure.S1.** Size distribution of ultrabright NIR fluorescent silica nanoparticles obtained by means of the dynamic light scattering technique.

## Quantum yield measurement

All the samples are in water and excited at 720 nm in order to get full emission integration. ICG is the standard. The integration is obtained from FluorEscense software with peak information add-on (Horiba JobinYvon).

$$\Phi_{Si\_LS277} = \Phi_{ICG} * \frac{Slope_{Si\_LS277}}{Slope_{ICG}}$$

$\Phi_{Si\_LS277} = 0.03 * (53330000/109600000) = 0.015$ . And the specific numbers were derived from the following graphs.

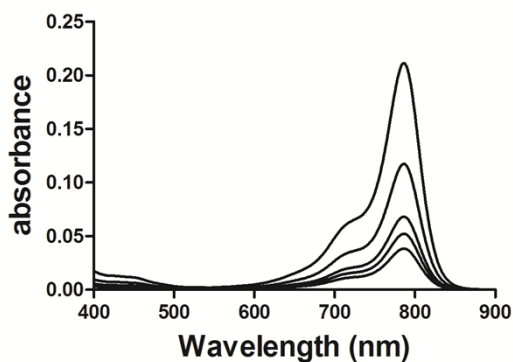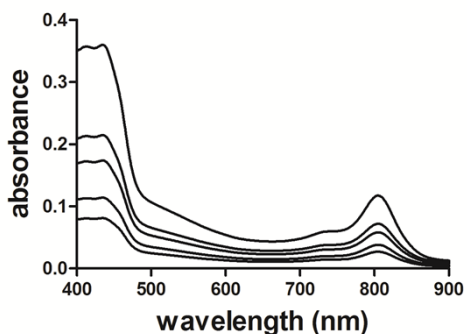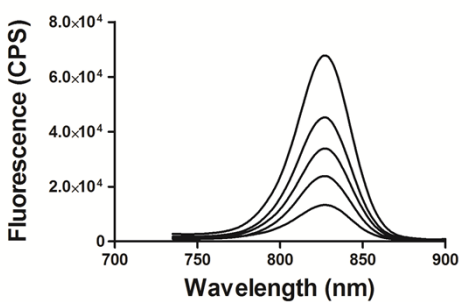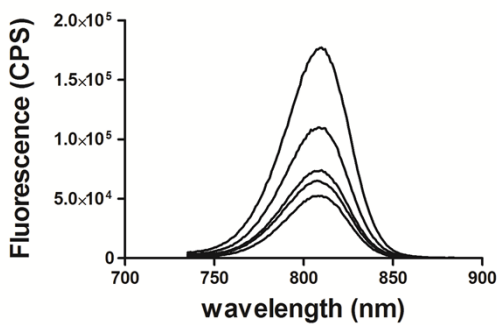

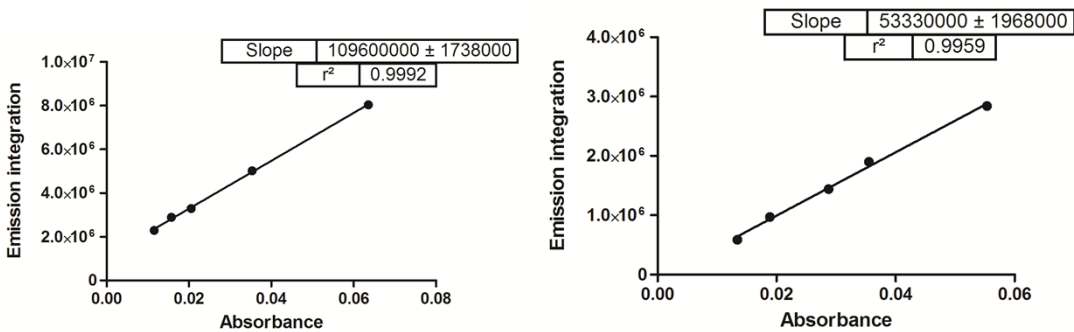

**Figure S2:** Absorption, emission spectra and fitting slop of ICG (left) and SiNP1\_LS277 (right) for relative quantum yield measurement.

### Lifetime measurement

Lifetime measurement is done in DAS 6 (decay analyst software, Horiba JobinYvon), the decay curve was fit with 2-exponential decay function, the goodness of the fit is represented by Chi<sup>2</sup>.

| Sample      | T1      | T1%  | T2      | T2% | $\chi^2$ |
|-------------|---------|------|---------|-----|----------|
| SiNP1_LS277 | 0.42 ns | 97.2 | 17.2 ns | 2.8 | 1.18     |
| SiNP2_LS277 | 0.37 ns | 95.7 | 20.1 ns | 4.3 | 1.21     |
